# Supplementary material
Source: publisher figshare collection journal article supplement (https://frontiersin.figshare.com/ndownloader/files/31415701)
Supplement: Supplementary file 1 [file 31415701]

# Women in Wildlife Trafficking - Survey

## Survey Flow

Block: Default Question Block (40 Questions)

Page Break

Hello. My name is Dr. Helen Agu. I am a scientist working at Michigan State University and University of Nigeria, Nsukka; I was awarded an [Alliance for African Partnership Early Career Scientist Award](#). I would like to ask you about your opinions about women and wildlife trafficking with a focus on women in Sub-Saharan Africa. The purpose of this survey is research. Illegal wildlife trade and wildlife trafficking create risks for species and societies. These environmental risks have implications beyond species extinction and animal welfare. Wildlife trafficking is associated with corruption, money laundering, degradation of the rule of law, insecurity, spread of disease, decreased sustainable development, decreased of cultural resources and links with other crimes.

The role of women in wildlife trafficking remains mostly unknown. We lack information about the costs and benefits of participating in wildlife trafficking. We do not know if thinking about women's roles in wildlife trafficking is necessary for combating wildlife trafficking. We do not know if woman have different priorities to participate in efforts to reduce wildlife trafficking-related risks. We also lack insight about the nuances of women's participation in poaching, trafficking, and selling illegal wildlife products, either directly or in supporting roles. Thus, programs designed to combat wildlife trafficking may fail to achieve objectives, be monitored and evaluated using the wrong measures, or quiet the voice of key stakeholders.

Your participation in this survey will help me and my collaborators better understand the role of women in wildlife trafficking in Sub-Saharan Africa. There are no right or wrong answers to the questions in this survey. You do not have to be a woman or live in Sub-Saharan Africa to participate, however this is the geographic focus of the survey. Results will be published in a report and presented to groups involved in efforts to combat wildlife trafficking and illegal wildlife trade in Africa.

Michigan State University sets rules about how I conduct surveys. Some of these rules are that personal information such as your name will never be associated with your responses. I will only give your survey a number. The funding for this study comes from Michigan State University's Alliance for African Partnership and the Department of Fisheries and Wildlife.

You may choose not to participate in the survey at any time. You may choose to not answer any question. You must be at least 18 of age to participate in this survey. By selecting the "Yes I understand" you are telling me that you are at least 18 years of age and want to participate in

the survey. The entire survey should take approximately **20 minutes** to complete. Do you have any questions before we get started? If you have any questions or comments, please contact Dr. Meredith Gore at [gorem@msu.edu](mailto:gorem@msu.edu) or WhatsApp at +1-607-592-0422.

---

By choosing "I consent," you agree that you consent to the terms of this survey as described above.

☐ I consent

---

Page Break

---

**This set of questions focuses on the different types of roles that women may play in wildlife trafficking in Sub-Saharan Africa. There are at least four categories of roles that women may play: offenders, defenders, influencers, and observers. By wildlife trafficking I mean the illegal trade in wild flora and fauna which includes the illegal supply chain over source, transit, and destination places.**

---

What percentage of wildlife trafficking **offenders** do you think are women in Sub-Saharan Africa? By offenders I mean a person who breaks the rule(s) at any space in the illegal wildlife supply chain. **Please move the slider bar to the percentage that best matches your current opinion.**

0 10 20 30 40 50 60 70 80 90 100

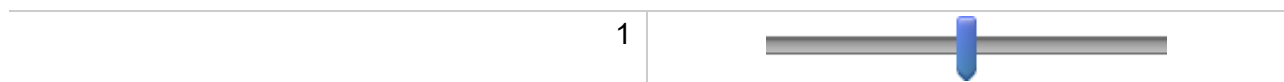

There are different types of offenders involved in wildlife trafficking. Among the list of illegal types below, what percentage of these types of wildlife trafficking offenders do you think are women? **Please move the slider bar to the percentage that best matches your current opinion.**

0 10 20 30 40 50 60 70 80 90 100

|                                                   |                                                                                    |
|---------------------------------------------------|------------------------------------------------------------------------------------|
| Consumers (buys/eats protected wildlife/tourists) |  |
| Corruptors (recruits new offenders)               |  |
| Enablers (permits/aids use of wildlife)           |  |
| Poachers (catches/kills wildlife)                 |  |
| Sellers (sells wildlife)                          |  |
| Transitors (moves wildlife)                       |  |
| Other                                             |  |

If you selected "Other" on the sliders above, please define what other offenders you are referring to.

---

How important is it to think about women as offenders of wildlife trafficking in Sub-Saharan Africa? **Please select one option based on your current opinion.**

|   | Extremely important   | Very important        | Moderately important  | Slightly important    | Not at all important  |
|---|-----------------------|-----------------------|-----------------------|-----------------------|-----------------------|
| 4 | <input type="radio"/> |

Can you provide a current example of women as offenders of wildlife trafficking in Sub-Saharan Africa? By current, I mean since 2015.

---



---



---

---

---

Page Break

What percentage of wildlife trafficking **defenders** do you think are women in Sub-Saharan Africa? By defenders I mean a person who guards the rule(s) at any space in the illegal wildlife supply chain. **Please move the slider bar to the percentage that best matches your current opinion**

0 10 20 30 40 50 60 70 80 90 100

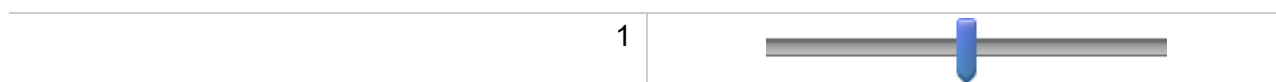

There are different types of defenders involved in wildlife trafficking. Among the list of types below, what percentage of these types of defenders are women? **Please move the slider bar to the percentage that best matches your current opinion.**

0 10 20 30 40 50 60 70 80 90 100

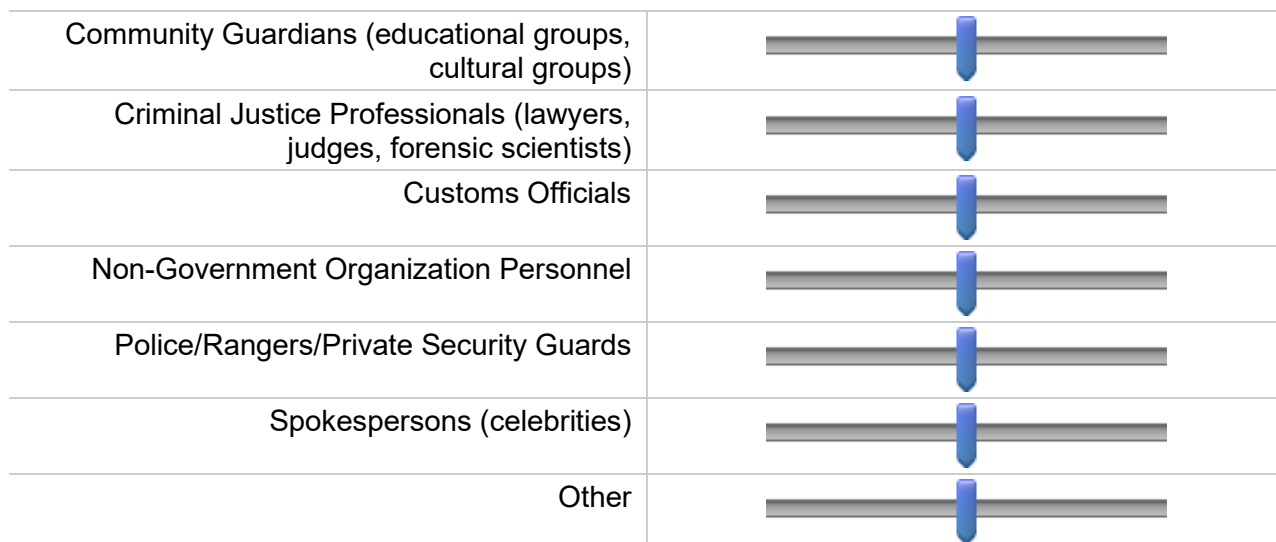

If you selected "Other" on the sliders above, please define what other defenders you are referring to.

---

How important is it to think about women as defenders of wildlife trafficking in Sub-Saharan Africa? **Please select one option based on your current opinion.**

|   | Extremely important   | Very important        | Moderately important  | Slightly important    | Not at all important  |
|---|-----------------------|-----------------------|-----------------------|-----------------------|-----------------------|
| 4 | <input type="radio"/> |

Can you provide a current example of women as defenders of wildlife trafficking in Sub-Saharan Africa? By current, I mean since 2015.

---

---

---

---

---

Page Break

What percentage of wildlife trafficking **influencers** do you think are women in Sub-Saharan Africa? By influencers I mean a person who is a friend and family member of, or culturally networked with another entity involved in wildlife trafficking at any space in the illegal supply chain. **Please move the slider bar to the percentage that best matches your current opinion.**

0 10 20 30 40 50 60 70 80 90 100

|   |                                                                                      |
|---|--------------------------------------------------------------------------------------|
| 1 |  |
|---|--------------------------------------------------------------------------------------|

There are different types of influencers involved in wildlife trafficking. Among the list of types below, what percentage of these types of influencers are women? **Please move the slider bar to the percentage that best matches your current opinion.**

0 10 20 30 40 50 60 70 80 90 100

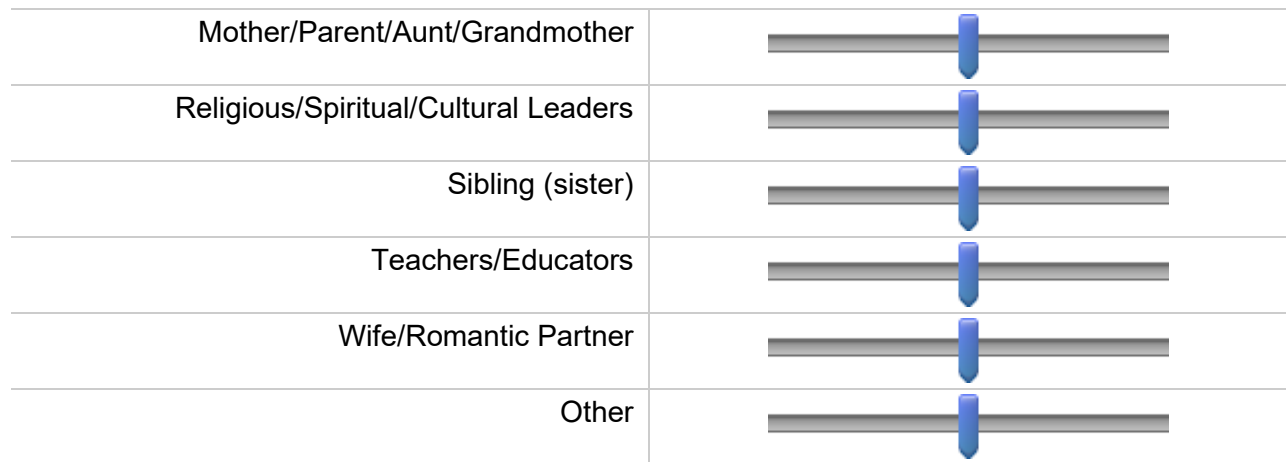

If you selected "Other" on the sliders above, please define what other influencers you are referring to.

\_\_\_\_\_

How important is it to think about women as influencers of wildlife trafficking at any stage of the illegal supply chain? **Please select one option based on your current opinion.**

|   | Extremely important   | Very important        | Moderately important  | Slightly important    | Not at all important  |
|---|-----------------------|-----------------------|-----------------------|-----------------------|-----------------------|
| 4 | <input type="radio"/> |

Can you provide a current example of women as influencers of wildlife trafficking in Sub-Saharan Africa? By current, I mean since 2015.

---

---

---

---

---

Page Break

What percentage of wildlife trafficking **observers** do you think are women in Sub-Saharan Africa? By observers I mean a person, institution or organization that intentionally bear witness on wildlife trafficking activities. **Please move the slider bar to the percentage that best matches your current opinion**

0 10 20 30 40 50 60 70 80 90 100

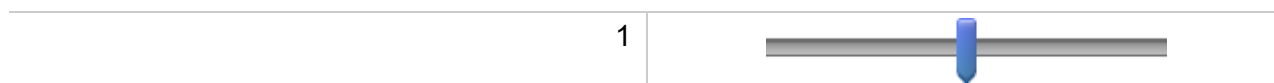

There are different types of observers involved in wildlife trafficking. Among the list of types below, what percentage of these types of observers are women? **Please move the slider bar to the percentage that best matches your current opinion.**

0 10 20 30 40 50 60 70 80 90 100

|                                                               |                                                                                    |
|---------------------------------------------------------------|------------------------------------------------------------------------------------|
| Donors (USAID, GIZ)                                           |  |
| Foundations (Gates, MacArthur)                                |  |
| Media/Journalists (National Geographic)                       |  |
| Parastatal Organizations (African Union Commission)           |  |
| Private Donors                                                |  |
| Scientists/ Researchers/Academics (Michigan State University) |  |
| Other                                                         |  |

If you selected "Other" on the sliders above, please define what other roles you are referring to.

---

How important is it to think about women as observers of wildlife trafficking? **Please select one option based on your current opinion.**

|   | Extremely important   | Very important        | Moderately important  | Slightly important    | Not at all important  |
|---|-----------------------|-----------------------|-----------------------|-----------------------|-----------------------|
| 4 | <input type="radio"/> |

Can you provide a current example of women as observers of wildlife trafficking in Sub-Saharan Africa? By current, I mean since 2015.

---



---



---



---



---

Page Break

**This set of questions focuses on different types of harms and benefits that women may experience because of wildlife trafficking in Sub-Saharan Africa.**

What percentage of individuals **harmed** by wildlife trafficking are women? By individuals harmed I mean people that are negatively affected in some way. **Please move the slider bar to the percentage that best matches your current opinion.**

0 10 20 30 40 50 60 70 80 90 100

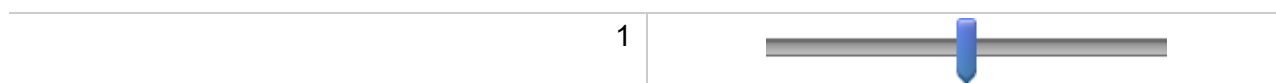

There are different types of ways that women may be harmed by wildlife trafficking. Among the list of types below, what percentage of these types of harmed individuals are women? **Please move the slider bar to the percentage that best matches your current opinion.**

0 10 20 30 40 50 60 70 80 90 100

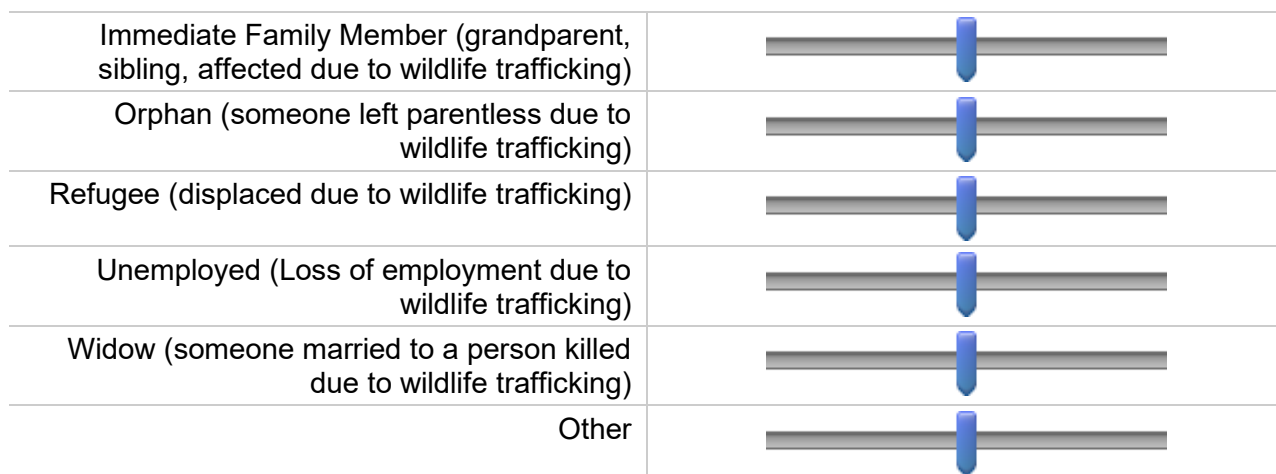

If you selected "Other" on the sliders above, please define what harms you are referring to.

---

How important is it to think about women as individuals harmed by wildlife trafficking? **Please select one option based on your current opinion.**

|   | Extremely important   | Very important        | Moderately important  | Slightly important    | Not at all important  |
|---|-----------------------|-----------------------|-----------------------|-----------------------|-----------------------|
| 4 | <input type="radio"/> |

Can you provide a current example of women being harmed by wildlife trafficking in Sub-Saharan Africa? By current, I mean since 2015.

---

---

---

---

---

Page Break

What percentage of women are **beneficiaries** of wildlife trafficking in Sub-Saharan Africa? By beneficiaries, I mean people that are positively affected in some way. **Please move the slider bar to the percentage that best matches your current opinion.**

0 10 20 30 40 50 60 70 80 90 100

|   |                                                                                      |
|---|--------------------------------------------------------------------------------------|
| 1 |  |
|---|--------------------------------------------------------------------------------------|

There are different types of ways that women may benefit from wildlife trafficking. Among the list of types below, what percentage of these types of benefits affect women? **Please move the**

slider bar to the percentage that best matches your current opinion.

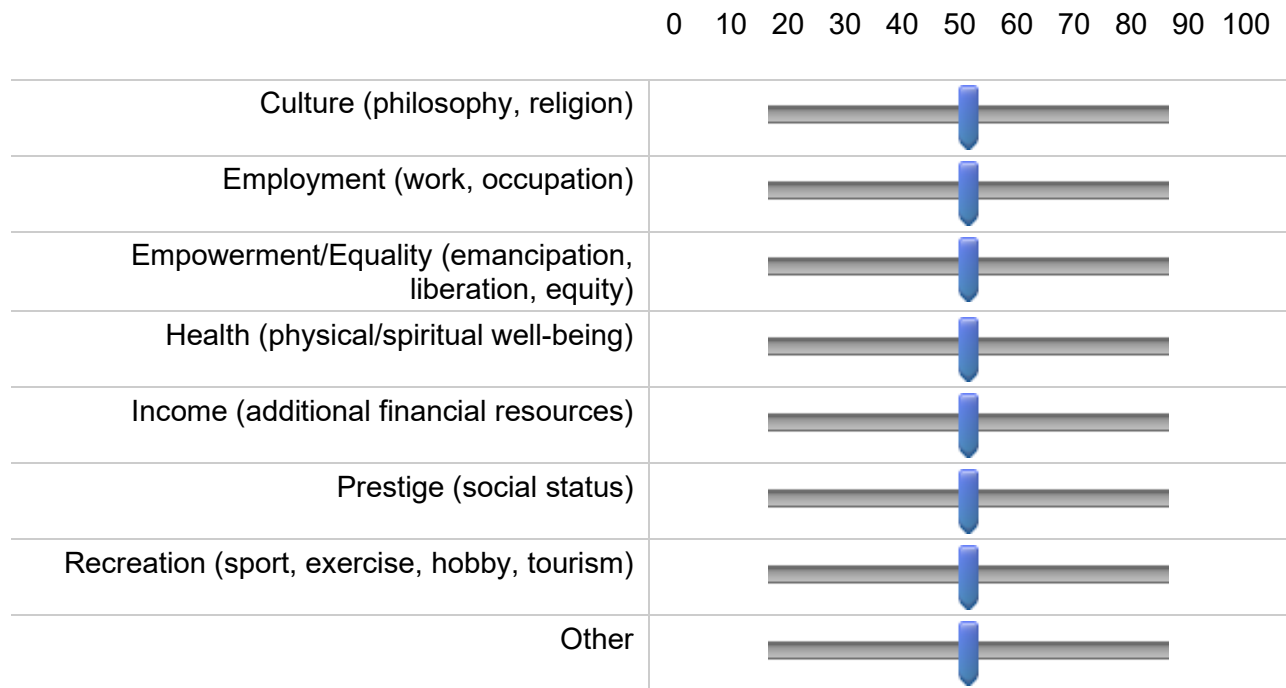

If you selected "Other" on the sliders above, please define what other benefits you are referring to.

---

How important is it to think about women as benefiting from wildlife trafficking in Sub-Saharan Africa? **Please select one option based on your current opinion.**

|   | Extremely important   | Very important        | Moderately important  | Slightly important    | Not at all important  |
|---|-----------------------|-----------------------|-----------------------|-----------------------|-----------------------|
| 4 | <input type="radio"/> |

Can you provide a current example of women benefitting from wildlife trafficking in Sub-Saharan Africa? By current, I mean since 2015.

---

---

---

---

---

---

Page Break

**This last set of questions focuses on you and your characteristics.**

---

What is your age (in years)?

- ☐ 18-22
  - ☐ 23-27
  - ☐ 28-32
  - ☐ 33-37
  - ☐ 38-42
  - ☐ 43-47
  - ☐ 48-52
  - ☐ 53-57
  - ☐ 58-62
  - ☐ 63+
-

What is your gender?

- ☐ Male
- ☐ Female
- ☐ Nonbinary
- ☐ Other

---

In what country do you currently reside?

---

---

Is there anything else related to women and wildlife trafficking that you would like to comment on, with a focus on Sub-Saharan Africa?

---

---

---

---

---

---

Page Break

Thank you very much for your time and assistance with my project. If you would like me to follow up with you and let you know the results of my analysis please provide me with your email.

---

---

---

---
